# Supplementary material for: Compositions of the major ions, variations in their sources, and a risk assessment of the Qingshuijiang River Basin in Southwest China: a 10-year comparison of hydrochemical measurements
Source: PeerJ. 2024 Oct 31;12:e18284. doi: 10.7717/peerj.18284 (PMC11531746; doi:10.7717/peerj.18284)
Supplement: Supplemental Information 1 [file peerj-12-18284-s001.xlsx]

## Sheet: Sheet1
Sampling time	Sample Id	pH	DO	EC	T	F-	Cl-	NO3-	SO42-	Na+	K+	Mg2+	Ca2+	HCO3-
		/	mg/L	us/cm	℃	mmol/L	mmol/L	mmol/L	mmol/L	mmol/L	mmol/L	mmol/L	mmol/L	mmol/L
2023/2	G1	8.45	11.99	456	10.5	0.00872435	0.300607	0.132319	0.530697	0.326029	0.0726568	0.89603	1.28639	3.3625
2023/2	G2	8.41	10.54	467	10.8	0.00493233	0.221565	0.0947329	0.345675	0.22397	0.0476687	1.15225	1.15935	4.0375
2023/2	G3	8.46	10.42	475	10.6	0.00441704	0.222367	0.100474	0.341054	0.232572	0.0491659	1.1816	1.23733	4.09167
2023/2	G4	8.48	10.26	547	10.4	0.00842046	0.315948	0.145992	0.655289	0.455475	0.0833701	1.09984	1.45815	4
2023/2	G5	8.37	10.77	583	8.6	0.00978136	0.306977	0.129727	0.953977	0.529462	0.0983426	1.15294	1.6206	3.8875
2023/2	G6	8.55	11	524	10.3	0.00938499	0.272118	0.10308	0.789978	0.465796	0.0795034	1.10209	1.42295	3.61667
2023/2	G7	8.23	10	517	12.6	0.0096096	0.278092	0.117259	0.784869	0.467701	0.0814513	1.0875	1.42799	3.575
2023/2	G8	8.03	9.23	323	14.6	0.007522	0.140938	0.0658685	0.432619	0.260145	0.0568557	0.6089	0.845718	2.325
2023/2	G9	8.05	9.47	282	13.2	0.0116311	0.126944	0.0887969	0.35827	0.232864	0.0546461	0.512843	0.728176	1.91667
2023/2	G10	8.08	10.1	272	12.8	0.0080373	0.113795	0.0524103	0.331379	0.222376	0.0426972	0.489103	0.702036	1.90833
2023/2	G11	8.16	9.45	277	12.7	0.00727096	0.113224	0.054082	0.337186	0.218851	0.0434676	0.495002	0.711916	1.90417
2023/2	G12	8.19	10.03	277	12.6	0.00715205	0.113423	0.0568495	0.342503	0.22201	0.044398	0.498123	0.708809	1.89583
2023/2	G13	8.12	9.72	275	12.3	0.00713884	0.118563	0.0555992	0.336736	0.225579	0.0439037	0.491026	0.704606	1.88333
2023/2	G14	8.1	9.67	276	12.6	0.00651784	0.108332	0.0489544	0.306075	0.223473	0.0438165	0.48963	0.706646	1.95
2023/2	G15	8.15	9.48	270	12	0.00657069	0.107711	0.049404	0.296417	0.223093	0.0441363	0.466974	0.693455	1.75833
2023/2	G16	8.25	9.47	272	11.9	0.00675567	0.111151	0.0588444	0.327741	0.216618	0.0434822	0.474925	0.702704	1.875
2023/2	G17	8.14	10.13	271	12.3	0.00663676	0.109425	0.0576643	0.318456	0.210505	0.0428426	0.461732	0.69776	1.94583
2023/2	Z1	8.31	10.97	428	13.1	0.00658391	0.225609	0.0949792	0.554264	0.263202	0.0530908	0.668382	1.07081	2.21
2023/2	Z2	8.22	10.92	478	10.8	0.00505124	0.0673447	0.0685236	0.0951985	0.0558252	0.0203984	1.36569	1.08581	5.0125
2023/2	Z3	8.12	8.77	1317	11.8	0.0301685	0.99241	0.408092	4.8755	1.98825	0.393021	1.3828	4.74722	3.58333
2023/2	Z4	8.36	10.4	437	9.5	0.00634608	0.180665	0.10457	0.412989	0.220869	0.0447178	0.704705	1.41411	3.50833
2023/2	Z5	8.18	10.04	1246	10.4	0.0305263	1.00789	0.492742	4.33531	2.03174	0.340256	1.33708	4.352	3.50417
2023/2	Z6	8.19	9.66	975	10.3	0.0723167	0.558998	0.198654	2.86289	2.51411	0.256237	1.18069	2.67424	3.8875
2023/2	Z7	8.4	10.2	735	11	0.0185149	0.415643	0.209655	1.64824	0.904332	0.152651	1.11898	2.25587	3.9125
2023/2	Z8	8.48	11.25	729	10	0.0186867	0.428173	0.203655	1.73779	0.867989	0.158276	1.14729	2.23766	3.625
2023/2	Z9	8.53	10.38	326	9.6	0.00583079	0.232306	0.143115	0.159326	0.329174	0.0267217	0.605535	0.764865	2.55
2023/2	Z10	8.39	11.55	135.9	8	0.00474735	0.078979	0.0412279	0.0985184	0.239417	0.0241488	0.14785	0.338456	0.9625
2023/2	Z11	8.35	10.32	248	9.9	0.0060554	0.224595	0.127653	0.170147	0.377928	0.0543118	0.384248	0.607644	1.79167
2023/2	Z12	8.43	11.38	58.6	13.2	0.00433776	0.042052	0.0290902	0.0640789	0.148589	0.00862387	0.0383516	0.0911492	0.255
2023/2	Z13	7.86	10.32	68.8	12.8	0.00444346	0.0273507	0.0127521	0.0641918	0.164761	0.0136535	0.0592499	0.142063	0.425
2023/2	Z14	8.35	9.43	176.4	12.3	0.0067821	0.0764585	0.0450631	0.204099	0.169094	0.0361413	0.283813	0.431243	1.175
2023/2	Z15	8.26	12.5	110.4	11.3	0.00695386	0.125715	0.0365498	0.0800129	0.294155	0.0354581	0.0956272	0.260307	0.716667
2023/2	Z16	8.11	10.77	231	10.9	0.00472093	0.253693	0.136194	0.111952	0.337687	0.0565213	0.101701	0.773518	1.6875
2023/2	Z17	8.43	12.37	221	11.5	0.00588364	0.232424	0.117634	0.10501	0.340481	0.0558963	0.106178	0.697063	1.51667
2023/2	Z18	8.5	11.15	164.8	7.9	0.00662355	0.111672	0.020858	0.167225	0.258477	0.0413599	0.129599	0.466978	1.0875
2023/2	Z19	8.33	11.13	162.6	10	0.00439061	0.0974301	0.0467769	0.217824	0.240368	0.0464331	0.114377	0.464176	0.870833
2023/2	Z20	8.21	10.64	314	9.5	0.00707277	0.43364	0.167242	0.416259	0.672598	0.105611	0.267267	0.783732	1.5
2023/2	Z21	8.25	11.95	185.1	10.5	0.00641214	0.198268	0.0335716	0.215906	0.360507	0.0487298	0.148768	0.47866	1.075
2023/2	Z22	7.91	6.33	415	9.7	0.00727096	0.295714	0.194028	0.738832	0.45228	0.0796052	0.378112	1.32086	2.16667
2023/2	Z23	7.97	10.26	427	9.6	0.00765413	0.352956	0.28724	0.720307	0.551694	0.0995782	0.352394	1.28844	2.0875
2023/2	Z24	8.19	10.19	270	11.9	0.00761449	0.129676	0.0672312	0.337048	0.242987	0.0521168	0.466371	0.736982	1.89583
2023/9	G1	8.87	7.72	372	25.2	0.00648681	0.144648	0.0865568	0.514348	0.175865	0.0470287	0.711855	1.17061	2.8125
2023/9	G2	8.35	8.44	364	24.6	0.00512806	0.145224	0.0768952	0.324446	0.189744	0.0493434	0.739701	1.10374	2.9625
2023/9	G3	8.25	8.12	380	24.5	0.00511433	0.195212	0.0146671	0.335322	0.240995	0.0581746	0.75364	1.13136	3.1875
2023/9	G4	8.27	7.53	453	25.1	0.0079279	0.171487	0.0737132	0.680656	0.295752	0.0753064	0.810514	1.43067	3.01875
2023/9	G5	8.73	17.86	404	25.9	0.00661033	0.202669	0.116235	0.514047	0.311646	0.118401	0.750803	1.20227	2.98125
2023/9	G6	8.87	2.62	372	27.4	0.00897098	0.161514	0.108641	0.522462	0.240278	0.0646617	0.683707	1.17638	2.98125
2023/9	G7	8.71	8.12	355	28.1	0.00623976	0.137036	0.0038004	0.433239	0.221252	0.0603861	0.623458	1.1103	2.64375
2023/9	G8	8.96	8.99	296	28.9	0.00770831	0.14211	0.0416536	0.409275	0.270322	0.0606073	0.50177	0.851357	2.2875
2023/9	G9	8.85	7.4	260	29	0.00639073	0.139944	0.0595896	0.392534	0.2656	0.0582041	0.478049	0.685502	1.5375
2023/9	G10	7.97	4.19	241	24.5	0.00558097	0.120771	0.0925482	0.298549	0.22835	0.0495056	0.37631	0.698956	1.51875
2023/9	G11	8.49	7.81	267	25.1	0.00592409	0.130728	0.0984003	0.345704	0.243179	0.0535452	0.426022	0.762903	1.85625
2023/9	G12	8.65	7.95	270	25	0.00591037	0.135432	0.0912942	0.356516	0.252114	0.0552555	0.441178	0.785118	1.85625
2023/9	G13	8.37	7.83	197.8	27	0.00522413	0.12601	0.0639873	0.226133	0.26094	0.0515991	0.243586	0.522392	1.0875
2023/9	G14	7.92	5.37	228	26.7	0.00543	0.129324	0.0593344	0.271069	0.252361	0.0528376	0.321891	0.647188	1.55625
2023/9	G15	9.49	10.76	201	29.65	0.0057594	0.141705	0.0724675	0.296477	0.270399	0.0564792	0.319586	0.530762	1.1625
2023/9	G16	7.83	2.43	242	26.8	0.00566332	0.143758	0.0731129	0.317926	0.255647	0.0561401	0.351723	0.655519	1.48125
2023/9	G17	8.57	7.46	220	27.3	0.00547118	0.143826	0.107067	0.259218	0.258533	0.0627746	0.303481	0.590446	1.3125
2023/9	Z1	8.97	10.02	405	24.1	0.00699462	0.139193	0.0808161	0.669298	0.216807	0.0392884	0.653635	1.42418	3.1875
2023/9	Z2	8.16	8.26	434	22.9	0.00552607	0.0770319	0.0597247	0.110976	0.071057	0.0273611	1.26047	1.09716	4.7625
2023/9	Z3	8.06	7.63	1001	24.6	0.0219683	0.396353	0.20649	3.19354	1.21248	0.390418	0.985297	3.60362	3.35625
2023/9	Z4	8.41	10.03	426	24.2	0.00586919	0.141952	0.0839512	0.581623	0.154597	0.0463357	0.704371	1.48033	3.2625
2023/9	Z5	8.23	8.05	642	23.9	0.0142825	0.305502	0.00650206	1.38816	0.609426	0.1691	0.986244	2.14198	3.58125
2023/9	Z6	8.79	12.6	768	23.7	0.0296816	0.367796	0.380612	2.1428	1.37982	0.148057	0.936891	2.51692	3.13125
2023/9	Z7	8.4	7.66	568	23.7	0.0106042	0.219546	0.0679497	1.11528	0.46263	0.105117	0.892827	1.93179	3.91875
2023/9	Z8	8.39	8.53	595	23.4	0.0116473	0.225434	0.0993896	1.33347	0.420557	0.102523	0.773995	1.74478	3.127
2023/9	Z9	9.65	9.12	179.5	26.3	0.00547118	0.118737	0.102469	0.12894	0.181344	0.0304867	0.92091	0.955166	3.65625
2023/9	Z10	8.45	9.36	103	21.8	0.00505943	0.0493384	0.013016	0.0812502	0.188054	0.0254592	0.119334	0.299595	0.95625
2023/9	Z11	8.46	7.47	154	25	0.00536138	0.0787376	0.039087	0.112148	0.242577	0.0417211	0.219135	0.397741	1.29375
2023/9	Z12	9.03	8.64	41.9	27.6	0.00514178	0.0208652	0.0158828	0.03886	0.146624	0.0123966	0.0368174	0.0921979	0.3375
2023/9	Z13	8.75	8.42	47.2	29.7	0.00514178	0.0273469	0.047177	0.0413447	0.151787	0.0171145	0.0428796	0.106468	0.3375
2023/9	Z14	8.78	7.61	23.1	27.7	0.00581429	0.139217	0.060355	0.346375	0.237887	0.050803	0.422306	0.566549	1.48125
2023/9	Z15	8.44	8.37	88.9	26.1	0.00527903	0.0810159	0.0108097	0.0565217	0.206244	0.0515401	0.0725713	0.229836	0.6375
2023/9	Z16	7.8	4.93	175.9	27	0.00501826	0.137073	0.0499687	0.127959	0.217147	0.0492549	0.0991989	0.618958	1.3875
2023/9	Z17	7.65	5.52	156.7	26.6	0.00505943	0.131103	0.0557772	0.111991	0.222101	0.052926	0.0924924	0.531513	1.18125
2023/9	Z18	8.14	8.49	215	23.5	0.00567705	0.276257	0.00335013	0.350886	0.46118	0.109806	0.272757	0.798126	1.89375
2023/9	Z18	8	8.37	330	26	0.00606134	0.194073	0.0458412	0.561963	0.340378	0.0874254	0.335741	1.09204	1.95
2023/9	Z19	8.27	8.35	152.4	24.9	0.00505943	0.0854142	0.00271974	0.125014	0.260153	0.0603419	0.108779	0.466291	1.0875
2023/9	Z20	8.67	9.82	273	26	0.00501826	0.144423	0.00153401	0.1881	0.343897	0.0639983	0.169303	0.678016	1.8
2023/9	Z21	7.67	7.66	110.5	27	0.00497709	0.0823927	0.0287307	0.106607	0.227517	0.0411756	0.0858108	0.286819	0.61875
2023/9	Z23	8.28	8.87	341	26.3	0.00588292	0.243046	0.0931891	0.55962	0.395343	0.103407	0.32569	1.12156	1.9875
2023/9	Z24	8.5	3.96	178	27.6	0.00545745	0.135252	0.0467117	0.175414	0.247731	0.0593983	0.208691	0.503752	1.325
2013/8	G1	8.22	7.95	—	25.1	0.00578947	0.12	0.0404823	0.45	0.15	0.04	0.78	1.02	2.86
2013/8	G2	8.13	6.28	—	26.1	0.00473684	0.12	0.0304355	0.34	0.12	0.04	0.95	1.06	3.5
2013/8	G3	8.01	5.35	—	25.8	0.00421053	0.16	0.0331226	0.33	0.19	0.05	0.97	1.08	3.69
2013/8	G4	8.01	4.98	—	24.9	0.0215789	0.14	0.0392726	0.75	0.22	0.05	1.01	1.34	3.34
2013/8	G5	8.37	8.47	—	26	0.0184211	0.13	0.0277161	0.85	0.19	0.05	0.98	1.27	3.23
2013/8	G6	8.06	6.68	—	27	0.0342105	0.16	0.0483984	0.74	0.24	0.06	0.9	1.26	2.98
2013/8	G7	9.9	12.3	—	30	0.0163158	0.13	0.0104726	0.61	0.18	0.05	0.88	1.15	3.21
2013/8	G8	9.41	11.34	—	30.6	0.0126316	0.11	0.0082	0.54	0.16	0.04	0.73	1.03	2.68
2013/8	G9	9.26	5.13	—	28.8	0.01	0.09	0.011129	0.45	0.14	0.03	0.5	0.76	1.88
2013/8	G10	7.55	6.33	—	25.1	0.00421053	0.07	0.00710645	0.07	0.16	0.03	0.1	0.17	0.64
2013/8	G11	9.14	12	—	24.7	0.00736842	0.06	0.0196145	0.23	0.13	0.03	0.24	0.48	1.18
2013/8	G12	7.64	6.75	—	28.3	0.00368421	0.1	0.00332419	0.06	0.17	0.03	0.09	0.49	1.15
2013/8	G13	7.43	5.38	—	21.7	0.00421053	0.06	0.00345645	0.1	0.21	0.04	0.08	0.23	0.72
2013/8	G14	7.7	6.5	—	24.9	0.00578947	0.07	0.0024871	0.16	0.16	0.03	0.17	0.43	1.07
2013/8	G15	9.31	10.27	—	28	0.00736842	0.07	0.00299032	0.24	0.15	0.03	0.2	0.46	1.06
2013/8	G16	7.28	5.72	—	23.3	0.00947368	0.08	0.0159032	0.34	0.12	0.03	0.26	0.52	1.15
2013/8	G17	7.8	7.8	—	24.2	0.00789474	0.07	0.01925	0.27	0.13	0.03	0.26	0.56	1.19
2013/8	Z1	8.32	7.65	—	24.1	0.00894737	0.05	0.0066	0.25	0.04	0.03	0.38	0.73	1.81
2013/8	Z2	8.09	7.06	—	24.3	0.0152632	0.06	0.0409806	0.1	0.05	0.03	1.12	0.99	4.61
2013/8	Z3	8.05	7.02	—	23.8	0.0536842	0.18	0.112789	0.95	0.34	0.07	0.99	1.55	3.64
2013/8	Z4	8.32	7.83	—	25.4	0.0126316	0.15	0.015121	0.69	0.18	0.06	0.67	1.52	3.32
2013/8	Z5	7.61	6.55	—	24.4	0.0826316	0.16	0.121724	0.92	0.35	0.07	1.08	1.51	3.27
2013/8	Z6	8.23	7.6	—	23.3	0.0652632	0.13	0.048	0.71	0.18	0.09	0.75	1.62	3.45
2013/8	Z7	8.21	6.9	—	25	0.0457895	0.1	0.0656032	0.64	0.26	0.04	0.98	1.36	3.27
2013/8	Z8	8.24	7.8	—	25.7	0.0321053	0.1	0.0522452	1.05	0.28	0.05	1.01	1.57	2.99
2013/8	Z9	8.84	9.28	—	26.1	0.00210526	0.06	0.0127597	0.08	0.2	0.03	0.08	0.19	0.54
2013/8	Z10	7.75	6.91	—	25.2	0.0194737	0.05	0.0079371	0.09	0.17	0.03	0.09	0.23	0.62
2013/8	Z11	7.71	5.56	—	26	0.00263158	0.08	0.00493226	0.1	0.21	0.04	0.22	0.36	1.18
2013/8	Z12	7.85	7.08	—	27.6	0.00210526	0.03	0.00477258	0.04	0.15	0.02	0.04	0.09	0.37
2013/8	Z13	8.07	7.05	—	28.4	0.00368421	0.04	0.000743548	0.13	0.14	0.02	0.16	0.26	0.75
2013/8	Z14	7.51	4.75	—	28.4	0.00526316	0.05	0.00255806	0.2	0.12	0.02	0.2	0.34	0.82
2013/8	Z15	8.33	8.23	—	26.6	0.00526316	0.13	0.00131774	0.05	0.22	0.04	0.09	0.18	0.64
2013/8	Z16	7.58	5.5	—	29.6	0.00315789	0.1	0.00327419	0.06	0.14	0.02	0.08	0.58	1.36
2013/8	Z17	7.31	4.06	—	28.6	0.00368421	0.1	0.00473871	0.06	0.15	0.02	0.08	0.61	1.45
2013/8	Z18	7.28	6.1	—	24.6	0.00315789	0.14	0.00725323	0.21	0.31	0.07	0.15	0.48	1.15
2013/8	Z18	7.19	3.3	—	25.6	0.00684211	0.13	0.0149661	0.33	0.21	0.06	0.18	0.86	1.65
2013/8	Z19	8.3	7.6	—	26.9	0.00368421	0.1	0.00625968	0.13	0.24	0.05	0.08	0.32	0.77
2013/8	Z20	7.6	7.75	—	26.1	0.00421053	0.09	0.00325161	0.12	0.21	0.05	0.11	0.45	1.07
2013/8	Z21	7.43	5.38	—	21.7	0.00842105	0.06	0.0206129	0.28	0.12	0.03	0.29	0.59	1.27
2013/8	Z23	7.38	5.55	—	26	0.00789474	0.14	0.02575	0.36	0.22	0.07	0.18	0.86	1.54
2013/8	Z24	7.78	7.2	—	27.1	0.00578947	0.13	0.00342258	0.1	0.27	0.04	0.11	0.44	1.13
2014/1	G1	8.6	12.84	397	8.5	0.00736842	0.12	0.439045	0.63	0.19	0.05	0.67	1.53	2.4
2014/1	G2	8.47	11.11	404	11.1	0.00421053	0.13	0.152179	0.34	0.16	0.04	0.89	1.22	2.99
2014/1	G3	8.19	8.81	423	10.8	0.00473684	0.16	0.120734	0.35	0.2	0.05	0.92	1.24	2.96
2014/1	G4	7.97	9.08	493	10.5	0.0263158	0.15	0.301439	0.77	0.32	0.05	0.98	1.49	2.75
2014/1	G5	8.05	9.22	490	10.4	0.0210526	0.15	0.214447	0.71	0.3	0.06	0.98	1.48	2.84
2014/1	G6	8.3	9.63	480	10.6	0.0347368	0.16	0.295395	0.76	0.34	0.05	0.92	1.43	2.57
2014/1	G7	7.7	7.06	307	15.5	0.0147368	0.1	0.0486516	0.44	0.18	0.04	0.51	0.84	1.47
2014/1	G8	7.71	7.33	271	16	0.0147368	0.09	0.0958081	0.42	0.17	0.04	0.49	0.8	1.45
2014/1	G9	7.74	7.23	267	15.9	0.0189474	0.09	0.0590081	0.38	0.16	0.04	0.48	0.79	1.44
2014/1	G10	7.66	7.08	270	15.2	0.0173684	0.09	0.0966581	0.38	0.16	0.04	0.47	0.8	1.52
2014/1	G11	7.67	7.24	267	15.4	0.0173684	0.09	0.0727806	0.38	0.16	0.04	0.47	0.81	1.49
2014/1	G12	7.6	7.3	268	15.2	0.0173684	0.09	0.0677839	0.38	0.17	0.04	0.48	0.82	1.49
2014/1	G13	7.78	11.28	103.3	8.7	0.00368421	0.06	0.0465952	0.16	0.21	0.03	0.09	0.28	0.45
2014/1	G14	7.644	7.57	265	14.8	0.02	0.1	0.0684581	0.45	0.17	0.04	0.47	0.79	1.42
2014/1	G15	7.65	8.2	248	14	0.0163158	0.08	0.0302855	0.35	0.17	0.04	0.43	0.75	1.35
2014/1	G16	7.71	9.42	216	12.8	0.0126316	0.09	0.0511903	0.32	0.17	0.04	0.33	0.65	1.14
2014/1	G17	7.72	9.81	217	12.2	0.0115789	0.08	0.0358194	0.31	0.17	0.04	0.33	0.66	1.16
2014/1	Z1	8.17	11.1	255	8.5	0.00789474	0.05	0.0448	0.35	0.04	0.02	0.4	0.9	1.54
2014/1	Z2	8.18	10.33	462	9.4	0.00157895	0.06	0.0473177	0.11	0.05	0.02	1.19	1.28	4.09
2014/1	Z3	7.65	8.92	1186	12.8	0.173684	0.22	2.22875	2.43	1.08	0.08	1.32	1.74	2.93
2014/1	Z4	8.56	12.03	431	11	0.00631579	0.12	0.0904129	0.69	0.16	0.05	0.72	1.54	2.98
2014/1	Z5	7.9	10.21	674	10.8	0.0263158	0.21	1.01532	1.3	0.72	0.07	1.21	1.73	2.82
2014/1	Z6	8.7	12.1	490	10.8	0.0252632	0.13	0.151027	0.5	0.21	0.05	0.86	1.75	3.54
2014/1	Z7	7.92	8.64	545	10.7	0.0531579	0.13	0.459682	0.92	0.47	0.05	1.01	1.64	2.71
2014/1	Z8	7.83	9.5	572	10.3	0.0584211	0.13	0.461195	1.21	0.46	0.05	1.04	1.74	2.44
2014/1	Z9	8.1	10.64	124.7	8.1	0.00210526	0.08	0.087071	0.1	0.19	0.02	0.19	0.3	0.73
2014/1	Z10	9.07	10.59	83	9.6	0.00157895	0.03	0.00780968	0.07	0.15	0.02	0.06	0.15	0.34
2014/1	Z11	7.76	10.25	118	9	0.00263158	0.07	0.062579	0.14	0.24	0.04	0.13	0.31	0.59
2014/1	Z12	7.32	10.85	37.7	8.7	0.00105263	0.02	0.0151113	0.05	0.13	0.01	0.03	0.07	0.18
2014/1	Z13	7.58	7.82	262	14.4	0.0126316	0.08	0.0434935	0.37	0.17	0.04	0.48	0.78	1.43
2014/1	Z14	7.07	5.62	138.2	15.6	0.00578947	0.06	0.00652742	0.2	0.13	0.02	0.22	0.37	0.69
2014/1	Z15	7.74	11.56	80	8	0.00263158	0.07	0.00196613	0.06	0.21	0.03	0.09	0.19	0.49
2014/1	Z16	7.65	10.43	123	8.9	0.00263158	0.08	0.0560435	0.11	0.15	0.03	0.08	0.43	0.74
2014/1	Z17	7.59	10.44	122.1	8.9	0.00263158	0.09	0.0429355	0.11	0.16	0.03	0.08	0.43	0.69
2014/1	Z18	7.52	10.71	154.7	8.7	0.00368421	0.1	0.00448226	0.26	0.28	0.04	0.13	0.48	0.68
2014/1	Z18	7.61	9.12	243	9.8	0.00578947	0.12	0.0484177	0.37	0.22	0.05	0.2	0.87	1.22
2014/1	Z19	7.18	10.33	75.4	9	0.00263158	0.05	0.0177194	0.1	0.19	0.03	0.06	0.18	0.32
2014/1	Z20	7.87	10.9	196.3	8.6	0.00421053	0.15	0.0717323	0.3	0.31	0.07	0.19	0.57	0.84
2014/1	Z21	7.63	6.88	271	15.4	0.0173684	0.09	0.0799242	0.38	0.16	0.04	0.48	0.81	1.44
2014/1	Z23	7.45	7.96	234	10.5	0.00526316	0.1	0.0568565	0.29	0.19	0.05	0.18	0.88	1.32
2014/1	Z24	7.98	11.16	131.1	9.6	0.00473684	0.09	0.0149355	0.11	0.24	0.03	0.1	0.41	0.78
